# Supplementary material for: The Role of Prophage ϕSa3 in the Adaption of Staphylococcus aureus ST398 Sublineages from Human to Animal Hosts
Source: MDPI journal article supplement (doi:10.3390/antibiotics13020112), 2024-01-23
Supplement: s1 [file s1]

**Supplementary Table 1.** Clinical and molecular summary of all ST398 isolates in our study.

| Isolate  | Country (City)    | Year | Host  | Age   | Additional information | Case              | Source | Clade | MRSA/MSSA | SCCmec | PVL | spa type |
|----------|-------------------|------|-------|-------|------------------------|-------------------|--------|-------|-----------|--------|-----|----------|
| GD1095   | China (Guangzhou) | 2010 | Human | Child | Community              | Colonization      | Nasal  | I     | MSSA      | -      | -   | t571     |
| GD1098   | China (Guangzhou) | 2010 | Human | Child | Community              | Colonization      | Nasal  | I     | MSSA      | -      | -   | t571     |
| GD1042   | China (Guangzhou) | 2010 | Human | Child | Community              | Colonization      | Nasal  | IIGOI | MSSA      | -      | -   | t034     |
| GD1088   | China (Guangzhou) | 2010 | Human | Child | Community              | Colonization      | Nasal  | IIGOI | MSSA      | -      | -   | t571     |
| GD1413   | China (Guangzhou) | 2010 | Human | Child | Community              | Colonization      | Nasal  | IIGOI | MSSA      | -      | -   | t034     |
| GD1539   | China (Guangzhou) | 2010 | Human | Child | Community              | Colonization      | Nasal  | IIGOI | MSSA      | -      | +   | t571     |
| GD2002   | China (Guangzhou) | 2010 | Human | Child | Community              | Colonization      | Nasal  | IIGOI | MSSA      | -      | -   | t034     |
| GD930    | China (Guangzhou) | 2010 | Human | Child | Community              | Colonization      | Nasal  | IIGOI | MSSA      | -      | -   | t571     |
| GD1703   | China (Guangzhou) | 2010 | Human | Child | Community              | Colonization      | Nasal  | IIGOI | MSSA      | -      | -   | t034     |
| 387T     | Canada (Calgary)  | 2014 | Human | Adult | Clinical (CUPS)        | Colonization      | Throat | I     | MSSA      | -      | -   | t571     |
| 387N     | Canada (Calgary)  | 2014 | Human | Adult | Clinical (CUPS)        | Colonization      | Nasal  | I     | MSSA      | -      | -   | t571     |
| 215N     | Canada (Calgary)  | 2014 | Human | Adult | Clinical (STI)         | Colonization      | Nasal  | I     | MSSA      | -      | -   | t571     |
| 215W     | Canada (Calgary)  | 2014 | Human | Adult | Clinical (STI)         | Infection         | Wound  | I     | MSSA      | -      | -   | t571     |
| 293G     | Canada (Calgary)  | 2014 | Human | Adult | Clinical (STI)         | Colonization      | Groin  | I     | MSSA      | -      | -   | t1451    |
| 232N     | Canada (Calgary)  | 2014 | Human | Adult | Clinical (STI)         | Colonization      | Nasal  | I     | MSSA      | -      | -   | t571     |
| GD53.1   | China (Guangzhou) | 2010 | Human | 8     | Hospital               | Colonization      | Nasal  | IIGOI | MSSA      | -      | -   | t034     |
| GD1067   | China (Guangzhou) | 2010 | Human | Child | Community              | Colonization      | Nasal  | IIGOI | MSSA      | -      | -   | t571     |
| GD1414   | China (Guangzhou) | 2010 | Human | Child | Community              | Colonization      | Nasal  | IIGOI | MSSA      | -      | -   | t571     |
| GD1449   | China (Guangzhou) | 2010 | Human | Child | Community              | Colonization      | Nasal  | IIGOI | MSSA      | -      | -   | t1451    |
| GD1211   | China (Guangzhou) | 2010 | Human | Child | Community              | Colonization      | Nasal  | I     | MSSA      | -      | -   | t571     |
| GD149    | China (Guangzhou) | 2010 | Human | 13    | Community              | Colonization      | Nasal  | IIGOI | MSSA      | -      | -   | t034     |
| GD1259   | China (Guangzhou) | 2010 | Human | Child | Community              | Colonization      | Nasal  | I     | MSSA      | -      | -   | t571     |
| GD1930   | China (Guangzhou) | 2010 | Human | Child | Community              | Colonization      | Nasal  | IIGOI | MSSA      | -      | -   | t034     |
| GD5      | China (Guangzhou) | 2010 | Human | 8     | Hospital               | Colonization      | Nasal  | IIGOI | MRSA      | V      | -   | t034     |
| GD1616   | China (Guangzhou) | 2010 | Human | Child | Community              | Colonization      | Nasal  | IIGOI | MSSA      | -      | -   | t571     |
| GD1853   | China (Guangzhou) | 2010 | Human | Child | Community              | Colonization      | Nasal  | IIGOI | MSSA      | -      | -   | t571     |
| GD104    | China (Guangzhou) | 2010 | Human | 13    | Hospital               | Colonization      | Nasal  | IIGOI | MSSA      | -      | -   | t571     |
| GD33     | China (Guangzhou) | 2010 | Human | 8     | Hospital               | Colonization      | Nasal  | IIGOI | MSSA      | -      | -   | t1451    |
| GD2000   | China (Guangzhou) | 2010 | Human | Child | Community              | Colonization      | Nasal  | IIGOI | MSSA      | -      | -   | t034     |
| GD223    | China (Guangzhou) | 2010 | Human | Child | Community              | Colonization      | Nasal  | IIGOI | MSSA      | -      | -   | t034     |
| 08S-0030 | Canada (Winnipeg) | 2008 | Human | Adult | Clinical               | na                | na     | Ila1i | MRSA      | V      | -   | t034     |
| CF-EHF   | Canada (Calgary)  | 2005 | Human | 19    | Clinical (CF)          | Chronic infection | Sputum | Ila1i | MSSA      | -      | -   | t034     |

|           |                   |      |       |       |           |              |       |       |      |   |   |       |
|-----------|-------------------|------|-------|-------|-----------|--------------|-------|-------|------|---|---|-------|
| GD1696    | China (Guangzhou) | 2010 | Human | Child | Community | Colonization | Nasal | IIGOI | MSSA | - | - | t034  |
| GD1706    | China (Guangzhou) | 2010 | Human | Child | Community | Colonization | Nasal | IIGOI | MSSA | - | - | t034  |
| GD1677    | China (Guangzhou) | 2010 | Human | Child | Community | Colonization | Nasal | IIGOI | MSSA | - | - | t034  |
| GD1884    | China (Guangzhou) | 2010 | Human | Child | Community | Colonization | Nasal | IIGOI | MSSA | - | - | t034  |
| GD1108    | China (Guangzhou) | 2010 | Human | Child | Community | Colonization | Nasal | I     | MSSA | - | - | t571  |
| GD1130    | China (Guangzhou) | 2010 | Human | Child | Community | Colonization | Nasal | I     | MSSA | - | - | t571  |
| GD1517    | China (Guangzhou) | 2010 | Human | Child | Community | Colonization | Nasal | IIGOI | MSSA | - | - | t034  |
| GD1428    | China (Guangzhou) | 2010 | Human | Child | Community | Colonization | Nasal | IIGOI | MSSA | - | + | t1451 |
| GD705     | China (Guangzhou) | 2010 | Human | 13    | Community | Colonization | Nasal | IIGOI | MSSA | - | - | t011  |
| GD399     | China (Guangzhou) | 2010 | Human | 12    | Community | Colonization | Nasal | IIGOI | MSSA | - | - | t034  |
| GD487     | China (Guangzhou) | 2010 | Human | 11    | Community | Colonization | Nasal | I     | MSSA | - | - | t034  |
| GD1025    | China (Guangzhou) | 2010 | Human | Child | Community | Colonization | Nasal | IIGOI | MSSA | - | - | t034  |
| N09-00266 | Canada (Winnipeg) | 2009 | Human | Adult | Clinical  | na           | na    | IIa   | MRSA | V | - | t1250 |
